# Supplementary material
Source: publisher site journal article supplement (https://natureconservation.pensoft.net/article/36171/download/suppl/31/)
Supplement: Supplementary file 1

Table S1 Correlation coefficients between pairs of environmental variables

|  | altitude(m) | aspect(°) | slope (°) | annual mean temperature(°C) | mean diurnal range(°C) | isothermality | temperature seasonality | max temperature of warmest month(°C) | min temperature of coldest month(°C) | temperature annual range(°C) | mean temperature of wettest quarter(°C) | mean temperature of driest quarter(°C) |
| --- | --- | --- | --- | --- | --- | --- | --- | --- | --- | --- | --- | --- |
| aspect(°) | 0.09 |  |  |  |  |  |  |  |  |  |  |  |
| slope(°) | 0.14* | 0.07 |  |  |  |  |  |  |  |  |  |  |
| annual mean temperature(°C) | -0.81** | -0.11 | -0.15* |  |  |  |  |  |  |  |  |  |
| mean diurnal range(°C) | 0.48** | -0.20** | 0.26** | -0.35** |  |  |  |  |  |  |  |  |
| isothermality | 0.64** | -0.171* | 0.14* | -0.26** | 0.81** |  |  |  |  |  |  |  |
| temperature seasonality | -0.60** | -0.04 | 0.06 | 0.11 | -0.23** | -0.72** |  |  |  |  |  |  |
| max. temperature of warmest month(°C) | -0.92** | -0.12 | -0.08 | 0.88** | -0.25** | -0.41** | 0.50** |  |  |  |  |  |
| min. temperature of coldest month(°C) | -0.61** | -0.01 | -0.23** | 0.90** | -0.40** | -0.13* | -0.22** | 0.66** |  |  |  |  |
| temperature annual range(°C) | -0.30** | -0.15* | 0.21** | -0.12 | 0.25** | -0.30** | 0.86** | 0.31** | -0.48** |  |  |  |
| mean temperature of wettest quarter(°C) | -0.57** | -0.08 | -0.06 | 0.67** | -0.14* | -0.13 | 0.18** | 0.61** | 0.51** | 0.09 |  |  |
| mean temperature of driest quarter(°C) | -0.63** | -0.06 | -0.12 | 0.90** | -0.30** | -0.10 | -0.15* | 0.71** | 0.94** | -0.36** | 0.41** |  |
| mean temperature of warmest quarter(°C) | -0.95** | -0.10 | -0.12 | 0.91** | -0.43** | -0.52** | 0.48** | 0.96** | 0.72** | 0.21** | 0.63** | 0.74** |
| mean temperature of coldest quarter(°C) | -0.58** | -0.06 | -0.16* | 0.92** | -0.29** | -0.03 | -0.25** | 0.67** | 0.97** | -0.45** | 0.55** | 0.95** |
| annual precipitation(mm) | -0.51** | 0.07 | -0.03 | 0.49** | -0.43** | -0.38** | 0.09 | 0.46** | 0.57** | -0.18** | -0.08 | 0.64** |
| precipitation of wettest month(mm) | -0.436** | -0.02 | 0.03 | 0.54** | -0.23** | -0.15* | -0.05 | 0.46** | 0.58** | -0.23** | 0.07 | 0.66** |
| precipitation of driest month(mm) | -0.582** | 0.06 | -0.06 | 0.50** | -0.50** | -0.52** | 0.27** | 0.53** | 0.49** | -0.03 | -0.12 | 0.61** |
| precipitation seasonality | 0.49** | -0.14* | 0.08 | -0.15* | 0.52** | 0.72** | -0.59** | -0.35** | -0.10 | -0.31** | 0.16* | -0.14* |
| precipitation of wettest quarter(mm) | -0.42** | -0.02 | 0.02 | 0.57** | -0.26** | -0.12 | -0.14* | 0.45** | 0.65** | -0.33** | 0.04 | 0.72** |
| precipitation of driest quarter(mm) | -0.59** | 0.04 | -0.05 | 0.46** | -0.47** | -0.54** | 0.33** | 0.54** | 0.44** | 0.05 | -0.14* | 0.56** |
| precipitation of warmest quarter(mm) | -0.15* | 0.02 | -0.03 | 0.33** | -0.12 | 0.08 | -0.32** | 0.17* | 0.48** | -0.42** | 0.16* | 0.44** |
| precipitation of coldest quarter(mm) | -0.57** | 0.02 | -0.02 | 0.48** | -0.41** | -0.46** | 0.27** | 0.54** | 0.48** | 0.01 | -0.15* | 0.61** |

|  | mean temperature of warmest quarter(°C) | mean temperature of coldest quarter(°C) | annual precipitation(mm) | precipitation of wettest month(mm) | precipitation of driest month(mm) | precipitation  seasonality(mm) | precipitation of wettest quarter(mm) | precipitation of driest quarter(mm) | precipitation of warmest quarter(mm) |
| --- | --- | --- | --- | --- | --- | --- | --- | --- | --- |
| mean temperature of coldest quarter(°C) | 0.72** |  |  |  |  |  |  |  |  |
| annual precipitation(mm) | 0.48** | 0.48** |  |  |  |  |  |  |  |
| precipitation of wettest month(mm) | 0.46** | 0.55** | 0.88** |  |  |  |  |  |  |
| precipitation of driest month(mm) | 0.56** | 0.43** | 0.89** | 0.67** |  |  |  |  |  |
| precipitation seasonality(mm) | -0.38** | 0.02 | -0.53** | -0.12 | -0.73** |  |  |  |  |
| precipitation of wettest quarter(mm) | 0.46** | 0.61** | 0.91** | 0.98** | 0.72** | -0.15* |  |  |  |
| precipitation of driest quarter(mm) | 0.55** | 0.37** | 0.87** | 0.65** | 0.99** | -0.76** | 0.68** |  |  |
| precipitation of warmest quarter(mm) | 0.18** | 0.44** | 0.63** | 0.82** | 0.28** | 0.18** | 0.80** | 0.24** |  |
| precipitation of coldest quarter(mm) | 0.54** | 0.41** | 0.90** | 0.69** | 0.97** | -0.71** | 0.73** | 0.98** | 0.28** |

* Correlation is significant at the 0.05 level

** Correlation is significant at the 0.01 level

Table S2 Thresholds estimated by Maxent for the fitted model of *Magnolia officinalis* subsp. *officinalis*

| **Cloglog threshold** | **Description** | **Fractional predicted area †** | **Training omission rate‡** | **Test omission rate§** |
| --- | --- | --- | --- | --- |
| **0.016** | Fixed cumulative value 1 | 0.176 | 0.000 | 0.000 |
| **0.060** | Fixed cumulative value 5 | 0.099 | 0.024 | 0.000 |
| **0.143** | Fixed cumulative value 10 | 0.065 | 0.049 | 0.088 |
| **0.026** | Minimum training presence | 0.145 | 0.000 | 0.000 |
| **0.268** | 10 percentile training presence | 0.046 | 0.098 | 0.147 |
| **0.166** | Equal training sensitivity and specificity | 0.061 | 0.061 | 0.118 |
| **0.165** | Maximum training sensitivity plus specificity | 0.061 | 0.049 | 0.118 |
| **0.126** | Equal test sensitivity and specificity | 0.069 | 0.049 | 0.059 |
| **0.070** | Maximum test sensitivity plus specificity | 0.090 | 0.024 | 0.000 |
| **0.025** | Balance training omission, predicted area and threshold value | 0.148 | 0.000 | 0.000 |
| **0.149** | Equate entropy of threshold and original distributions | 0.064 | 0.049 | 0.088 |

† The fraction of the total study area predicted present.

‡ The proportion of the testing localities falling outside the prediction

§ The proportion of the training localities falling outside the prediction.

Table S3 Thresholds estimated by Maxent for the fitted model of *Magnolia officinalis* subsp. *biloba*

| **Cloglog threshold** | **Description** | **Fractional predicted area †** | **Training omission rate‡** | **Test omission rate§** |
| --- | --- | --- | --- | --- |
| **0.027** | Fixed cumulative value 1 | 0.126 | 0.000 | 0.000 |
| **0.109** | Fixed cumulative value 5 | 0.085 | 0.017 | 0.000 |
| **0.188** | Fixed cumulative value 10 | 0.064 | 0.050 | 0.080 |
| **0.106** | Minimum training presence | 0.086 | 0.000 | 0.000 |
| **0.256** | 10 percentile training presence | 0.053 | 0.100 | 0.080 |
| **0.192** | Equal training sensitivity and specificity | 0.063 | 0.067 | 0.080 |
| **0.181** | Maximum training sensitivity plus specificity | 0.066 | 0.017 | 0.080 |
| **0.152** | Equal test sensitivity and specificity | 0.073 | 0.017 | 0.080 |
| **0.143** | Maximum test sensitivity plus specificity | 0.074 | 0.017 | 0.000 |
| **0.026** | Balance training omission, predicted area and threshold value | 0.127 | 0.000 | 0.000 |
| **0.181** | Equate entropy of threshold and original distributions | 0.066 | 0.033 | 0.080 |

† The fraction of the total study area predicted present.

‡ The proportion of the testing localities falling outside the prediction

§ The proportion of the training localities falling outside the prediction.
